# Supplementary material
Source: MDPI journal article supplement (https://www.mdpi.com/2073-4344/12/12/1666)
Supplement: s1 [file s1 › catalysts-2062397-supplementary.pdf]

## Catalytic Degradation of Toluene over MnO<sub>2</sub>/LaMnO<sub>3</sub>: Effect of Phase Type of MnO<sub>2</sub> on Activity

Lu Li <sup>1,\*</sup>, Yuwei Liu <sup>2</sup>, Jingyin Liu <sup>2</sup>, Bing Zhou <sup>2</sup>, Mingming Guo <sup>3</sup> and Lizhong Liu <sup>2,\*</sup>

<sup>1</sup> State Key Laboratory of Electrical Insulation and Power Equipment, Center of Nanomaterials for Renewable Energy, School of Electrical Engineering, Xi'an Jiaotong University, Xi'an 710049, China

<sup>2</sup> School of Chemistry and Chemical Engineering, Nantong University, 9, Seyuan Road, Nantong 226019, China

<sup>3</sup> School of Environmental Science and Engineering, Shanghai Jiao Tong University, 800, Dong Chuan Road, Shanghai 200240, China

\* Correspondence: dorislee1224@xjtu.edu.cn (L.L.); lizliu@ntu.edu.cn (L.L.)

## Experimental details

### Text S1. Chemicals and materials

All the reagents for the preparation of catalysts were A.R. grade and were used directly without further purification. Potassium permanganate ( $\text{KMnO}_4$ ), manganese sulfate monohydrate ( $\text{MnSO}_4 \cdot \text{H}_2\text{O}$ ), lanthanum nitrate hexahydrate ( $\text{La}(\text{NO}_3)_3 \cdot 6\text{H}_2\text{O}$ ), and toluene were purchased from Sinopharm Chemical Reagent Co., Ltd. (Shanghai, China).

### Text S2. Characterization

The crystal structures of the samples were analyzed by powder X-ray diffraction (XRD, LabX XRD-6000, Cu K $\alpha$ ,  $\lambda=1.5406 \text{ \AA}$ , Shimadzu, Kyoto, Japan). The surface morphology was checked using field emission scanning electron microscopy (SEM, MIRA3-LHM, TESCAN Czech & BRUKER, Hamburg, Germany). X-ray photoelectron spectroscopy (XPS) was carried out on an RBD upgraded PHI-5000C ESCA system (Perkin-Elmer, Waltham, MA, USA) with Mg K $\alpha$  radiation ( $h\nu=1253.6 \text{ eV}$ ). Hydrogen temperature-programmed reduction ( $\text{H}_2$ -TPR) experiments were carried out on a chemical adsorption analyzer (Autochem II 2920, Micromeritics, Norcross, GA, USA) under  $\text{H}_2/\text{Ar}$  gas flow at a rate of  $10 \text{ }^\circ\text{C}/\text{min}$  up to  $600 \text{ }^\circ\text{C}$ . Before TPR measurement, the samples were pre-treated at  $300 \text{ }^\circ\text{C}$  for 1 hr in Ar ( $50 \text{ ml}\cdot\text{min}^{-1}$ ) to remove impurities adsorbed on the surface. A rare content of other byproducts in gas due to incomplete VOC mineralization was

detected by a thermal desorption/gas chromatograph mass spectrometer (TD/GC–MS) instrument. N<sub>2</sub> adsorption-desorption isotherms and Brunauer–Emmett–Teller (BET) specific surface area were obtained on Autosorb-iQ surface aperture adsorption instrument (Quantachrome Corporation, Boynton Beach, FL, USA) by N<sub>2</sub> physisorption at -196 °C. The pore size distributions were evacuated using the Barrett-Joyner-Halenda (BJH) method.

The reactant intermediate that occurred on the catalyst was investigated by in situ diffuse reflectance infrared Fourier transform spectroscopy (Nicolet 6700, Tübingen, Germany) (DRIFTS) experiment.

### **Text S3. Preparation of LaMnO<sub>3</sub>**

LaMnO<sub>3</sub> was prepared by direct calcination without adding water as a solvent of metal salts and citric acid. The specific preparation process was as follows: 5 mmol of Mn(Ac)<sub>2</sub>·4H<sub>2</sub>O, 5 mmol of La(NO<sub>3</sub>)<sub>3</sub>·6H<sub>2</sub>O, and 5 mmol of citric acid were mixed directly. Then, the mixed liquid was raised to 750 °C at 2 °C/min in air and maintained at 750 °C for 2 h.

### **Text S4. Preparation of MnO<sub>2</sub> with different crystal phases**

#### **1. Preparation of $\alpha$ -MnO<sub>2</sub>**

The typical preparation procedure of  $\alpha$ -MnO<sub>2</sub> was as follows: 1.25 g of KMnO<sub>4</sub> and 0.53 g of MnSO<sub>4</sub>·H<sub>2</sub>O were added to 80 mL deionized water and

agitated for 30 min at room temperature. The above-mixed solution was transferred to a 100 mL PTFE kettle, and the hydrothermal reaction was carried out at 160 °C for 12 h. The filtered precipitate was dried overnight at 80 °C and then calcined at 400 °C in a muffle furnace for 4 h.

## **2. Preparation of $\delta$ -MnO<sub>2</sub>**

The typical preparation procedure of  $\delta$ -MnO<sub>2</sub> was as follows: 1.50 g of KMnO<sub>4</sub> and 0.28 g of MnSO<sub>4</sub>·H<sub>2</sub>O were added to 80 mL deionized water and agitated for 30 min at room temperature. The above-mixed solution was transferred to a 100 mL PTFE kettle, and the hydrothermal reaction was carried out at 160 °C for 12 h. The filtered precipitate was dried overnight at 80 °C and then calcined at 400 °C in a muffle furnace for 4 h.

## **3. Preparation of $\beta$ -MnO<sub>2</sub>**

The typical preparation procedure of  $\beta$ -MnO<sub>2</sub> was as follows: 1.69 g of MnSO<sub>4</sub>·H<sub>2</sub>O and 2.28 g of (NH<sub>4</sub>)<sub>2</sub>S<sub>2</sub>O<sub>8</sub> were added to 80 mL deionized water and agitated for 30 min at room temperature. The above-mixed solution was transferred to a 100 mL PTFE kettle, and the hydrothermal reaction was carried out at 160 °C for 12 h. The filtered precipitate was dried overnight at 80 °C and then calcined at 400 °C in a muffle furnace for 4 h.

## **4. Preparation of $\gamma$ -MnO<sub>2</sub>**

The  $\gamma$ -MnO<sub>2</sub> was synthesized via the redox reaction of KMnO<sub>4</sub> and MnSO<sub>4</sub> in an acidic aqueous. The preparation procedure was as follows: 0.3169 g of MnSO<sub>4</sub> was dissolved in 60 ml of deionized water. Under vigorous

stirring at 80 °C in a water bath, 1 ml of concentrated H<sub>2</sub>SO<sub>4</sub> and 60 ml of 0.1 mol/L KMnO<sub>4</sub> were added by dripping. After additional stirring at 80 °C for 24 h. Afterward, the as-obtained black precipitate was washed and then dried at 60 °C, and the  $\gamma$ -MnO<sub>2</sub> sample was prepared.

#### **Text S5. Normalized reaction rate equation**

The specific surface area plays an important role in catalyst reaction activity. To rule out its impact as far as possible, the normalized reaction rate ( $r$ , mol·m<sup>-2</sup>·s<sup>-1</sup>) is derived from the following formula [45–47]:

$$r = \frac{C_{\text{in}} \cdot F}{m_{\text{cat}} \cdot S_{\text{BET}}} \cdot \ln\left(\frac{1}{1-X}\right) \quad (\text{eq. S1})$$

where  $r$  is the normalized reaction rate in a unit of mol·m<sup>-2</sup>·s<sup>-1</sup>;  $C_{\text{in}}$  is the toluene concentration in the inlet gas streams, zero dimension (ppm/1 000);  $F$  is the flow rate of toluene in a unit of mol s<sup>-1</sup>;  $m_{\text{cat}}$  is the amount of catalyst, g;  $S_{\text{BET}}$  is the surface area calculated by N<sub>2</sub> physisorption results obtained at  $P/P_0 = 0.05$ – $0.30$ , m<sup>2</sup> g<sup>-1</sup>;  $X$  is the toluene conversion efficiency.

The apparent reaction rates of prepared catalysts are calculated at low reaction efficiency (< 10%) [2] to reflect their inherent catalytic activities, where 210 °C was chosen as the basic calculation condition.

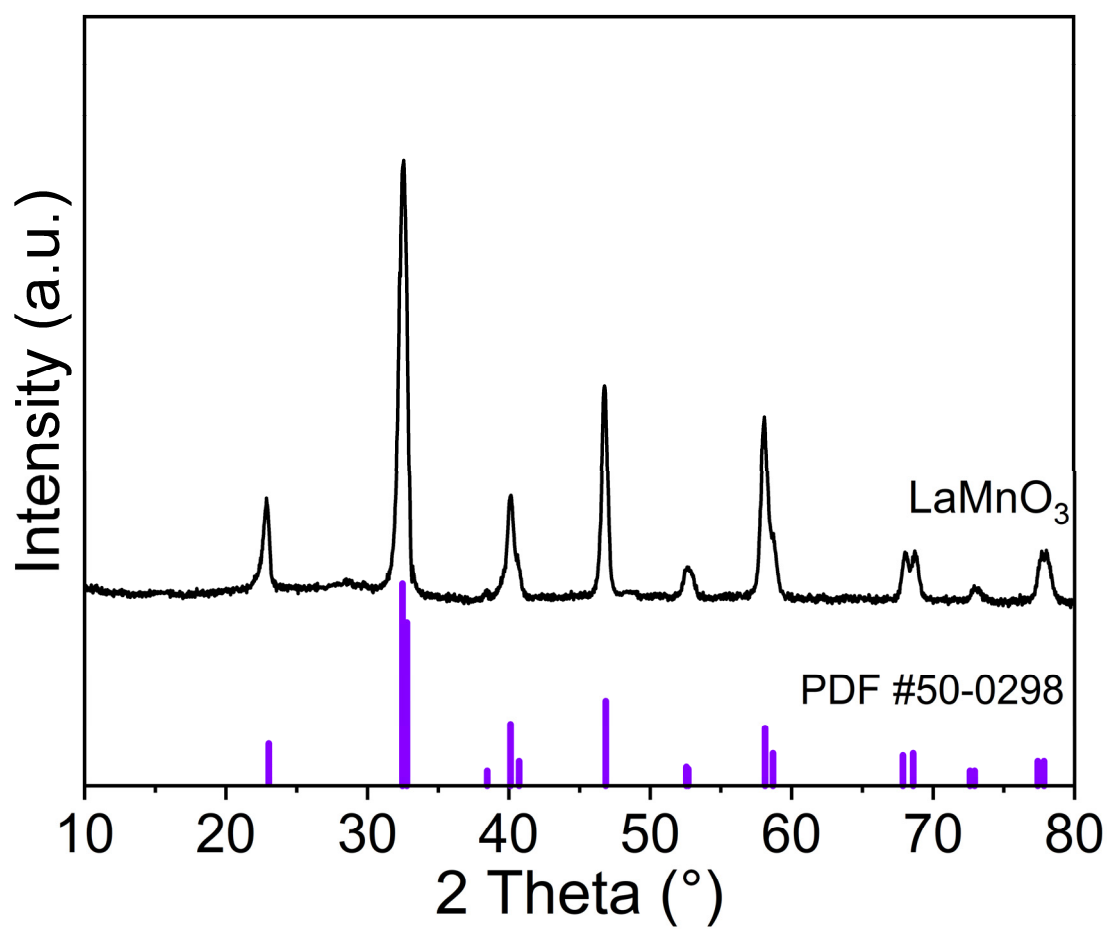

Figure S1. XRD patterns of LMO.

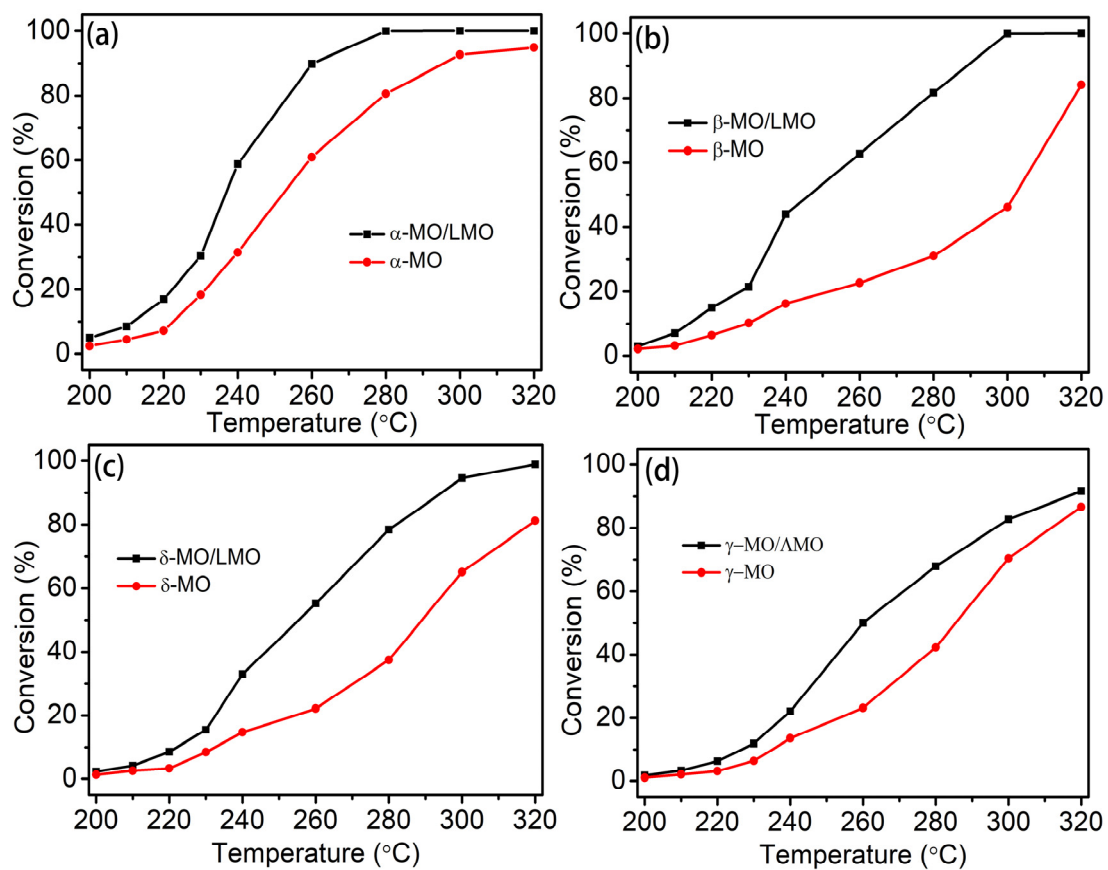

**Figure S2.** Toluene oxidation over of (a)  $\alpha$ -MO and  $\alpha$ -MO/LMO, (b)  $\beta$ -MO and  $\beta$ -MO/LMO, (c)  $\delta$ -MO and  $\delta$ -MO/LMO, (d)  $\gamma$ -MO and  $\gamma$ -MO/LMO
